# Supplementary material for: Ticagrelor Exerts Immune-Modulatory Effect by Attenuating Neutrophil Extracellular Traps
Source: PubMed Central journal article supplement (PMC7279443; doi:10.3390/ijms21103625), 2020-05-21
Supplement: ijms-21-03625-s001.pdf [file ijms-21-03625-s001.pdf]

Table S1. Characteristics of coronary artery disease patients and healthy individuals (controls).

| Parameters                    | Patients   | Healthy Individuals |
|-------------------------------|------------|---------------------|
| N                             | 10         | 10                  |
| Gender (M/F)                  | 8/2        | 8/2                 |
| Mean age $\pm$ SD             | 63 $\pm$ 3 | 61 $\pm$ 4          |
| Time since index PCI (months) | 8 $\pm$ 3  | -                   |
| Ticagrelor                    | 5          | -                   |
| Clopidogrel                   | 5          | -                   |
| Statins                       | 9/10       | -                   |
| Antihypertensives             | 5/10       | -                   |

PCI: percutaneous coronary intervention.
